# Supplementary material for: Optimal Investment Timing and Size of a Logistics Park: A Real Options Perspective
Source: Hindawi journal article supplement (doi:10.1155/2017/2813816), 2017-01-01
Supplement: f1 [file 2813816.f1.docx]

**Appendixes**

**Appendix A: Proof of Eq.(6)**

Substituting Eqs.(1),(2) and (3) into Eq.(5) , we obtain

(A.1)

As follows Geometric Brownian motion, we have

(A.2)

Substituting Eq.(A.2) into (A.1), we can obtain

(A.3)

Therefore we can obtain

(A.4)

This completes the proof of Eq.(6).

**Appendix B: Proof of Eqs. (9) and (10)**

Theis expanded and simplified in the following two-order differential equation using the Ito lemma according to Eq.(8):

. (B.1)

As the formula (B.1) is the standard Euler equation, so let, then

(B.2)

(B.3)

Substituting Eq.( B.2) and (B.3) into Eq.(B.1), we obtain

(B.4)

For the second order differential equation (B.4), its general solution has the following form:

(B.5)

Where are the parameters known. are the solutions of Eq. (B.6).

(B.6)

And

Substituting into Eq.(B.5) , then we have

(B.7)

Then the boundary conditions should meet the following conditions:

(B.8)

(B.9)

(B.10)

Because the Eq. (B.7) satisfies the boundary conditions of Eq.(B.8), that is should be 0 if is equal to 0, the must be equal to 0, otherwise, it will tend to infinity.

Then substituting Eqs.(B.9) and (B.10) into Eq.(B.7) ,we can obtain

(B.11)

(B.12)

Then we can get the parameter and threshold

(B.13)

(B.14)

Substituting Eq.(B.14) into Eq.(B.7), then

(B.15)

Therefore we can obtain

(B.16)

(B.17)

**Appendix C:proof of static analysis for the threshold** and

The partial derivatives of with regard to are then given as follows:

(C.1) (C.2)

(C.3)

(C.4)

(C.5)

(C.6)

(C.7)

(C.8)

(C.9)

Note that and hold, we thus obtain,

(C.10)

That is

,and (C.11)

Therefore, we can get

(C.12)

,,and (C.13)

However, the sign of and are ambiguous.
